# Supplementary material
Source: Springer Nature journal article supplement (https://www.springermedizin.de/resource/supplementary/12936_2012_2442_MOESM2_ESM.pdf/9542850)

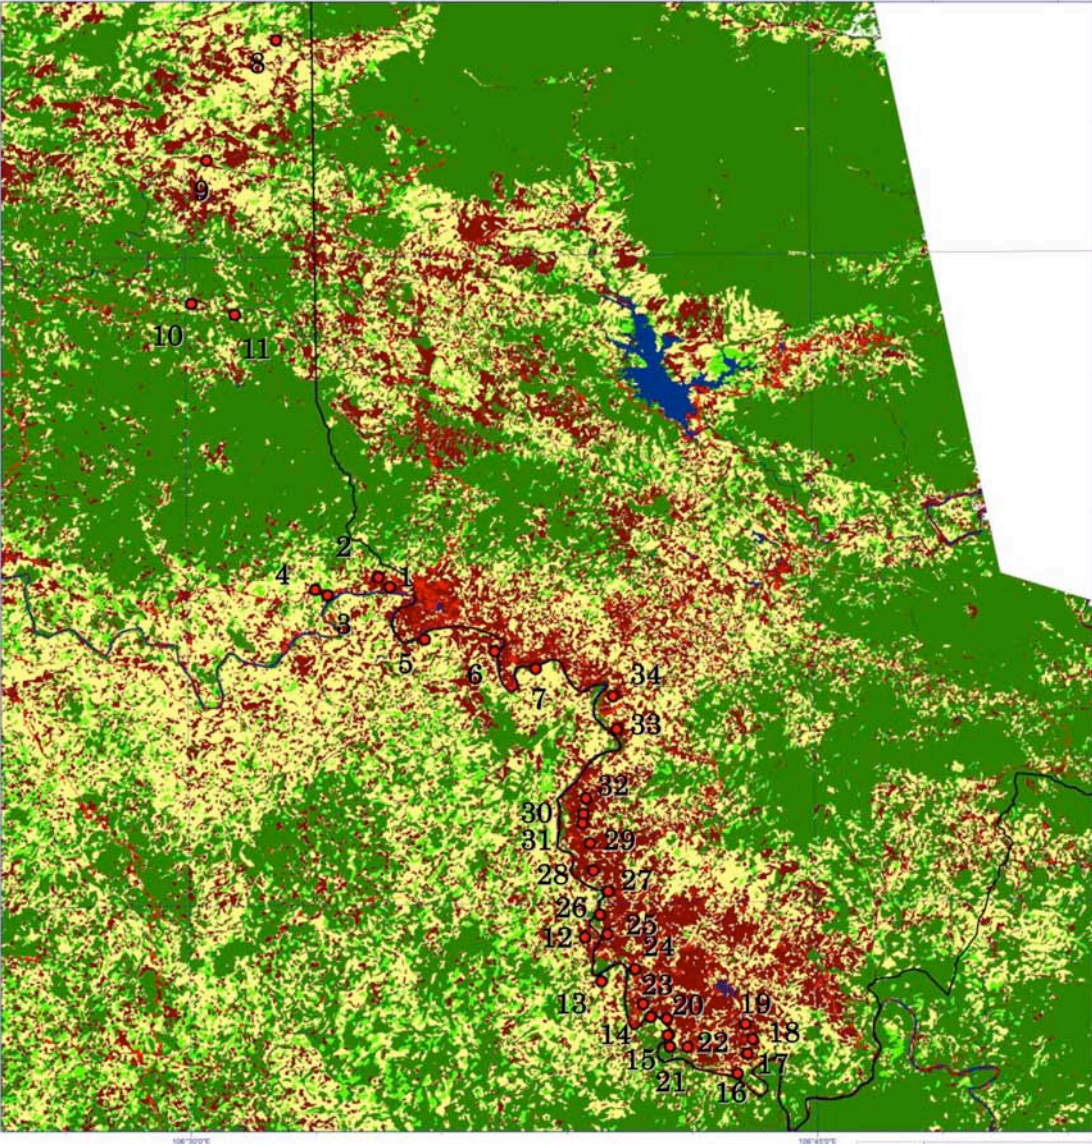

# Legend

● Study Site (Village Center)

— Laos, Countryborder

## Land-cover Classification

- Class 1: Water
- Class 2: Semi-Closed Forest
- Class 3: Open/Wild
- Class 4: Grassland/Bush
- Class 5: Closed Forest
- Class 6: Buildup
- Class 7: Bare

1:110,000  
0.8 4.0 0.9 1.8 2.7 3.6 4.5 5.4 6.3 7.2 8.1  
Km

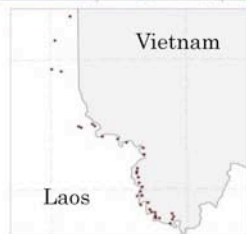

Supplement: MOESM2 [file 9542850]
